# Supplementary material
Source: PubMed Central journal article supplement (PMC2996029)
Supplement: pp.110.161984_1.pdf [file pp.110.161984_1.pdf]

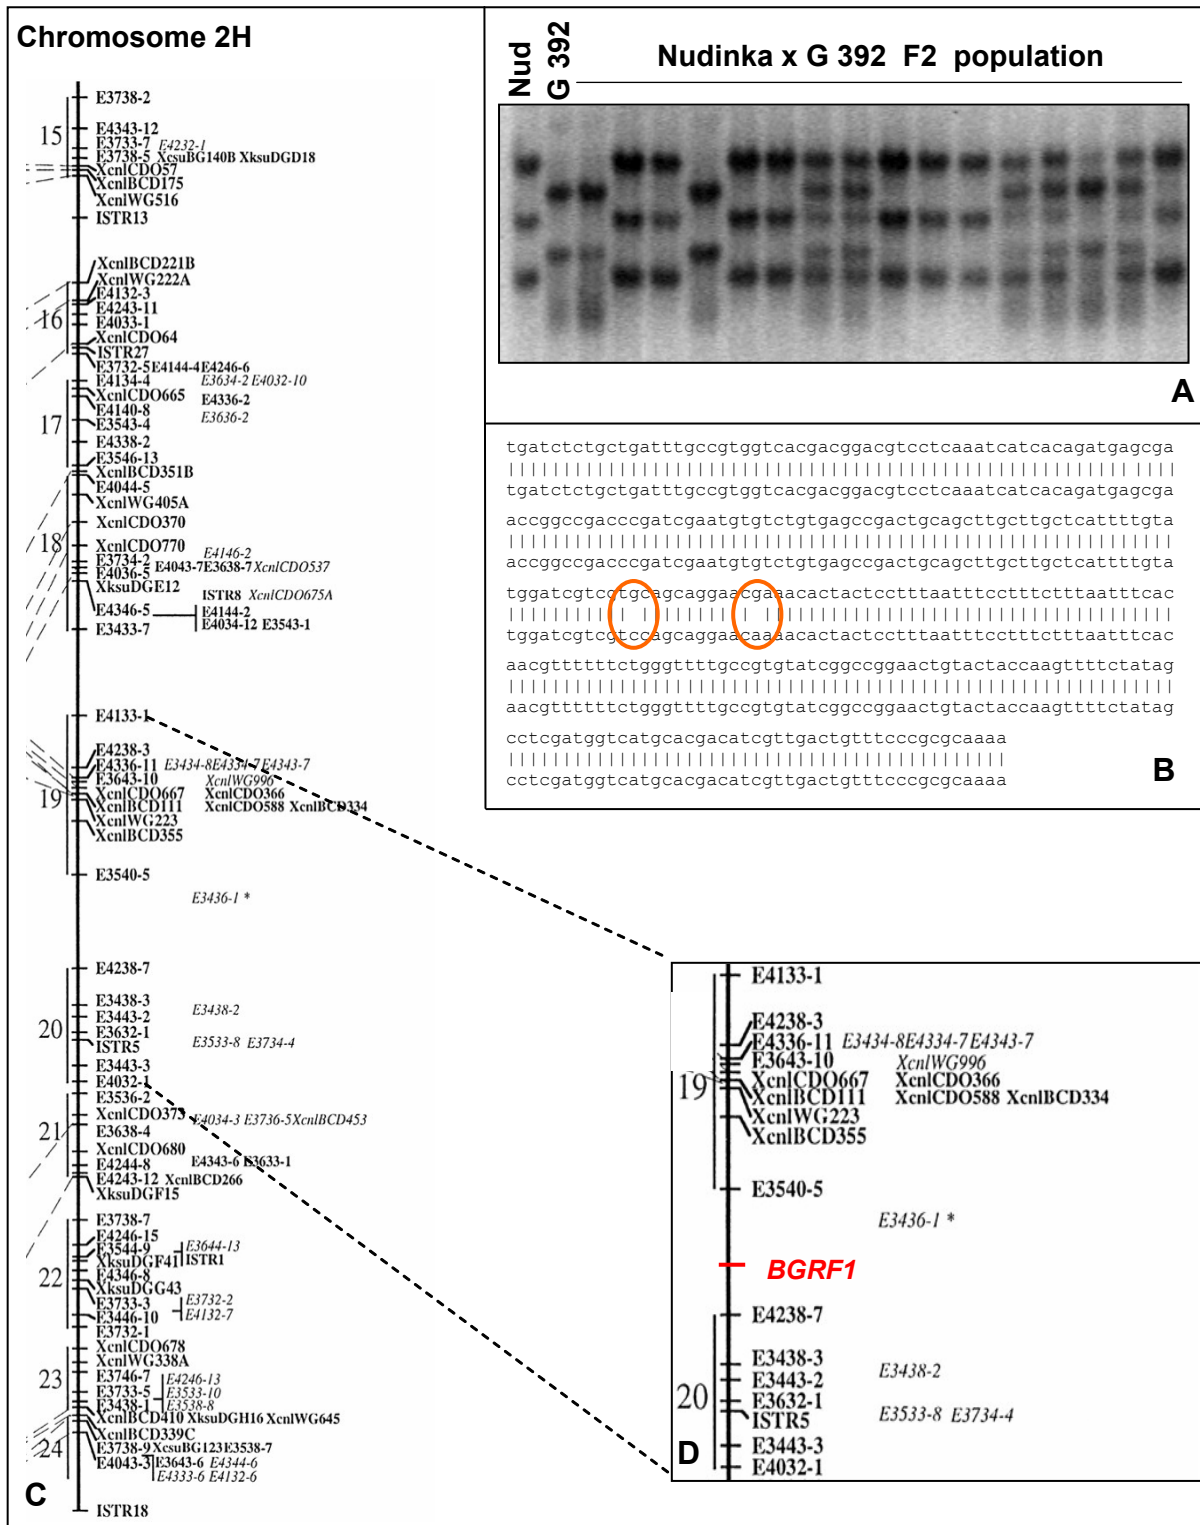

**Supplemental Figure 1A. Assignment of the *BGRF1* locus to barley chromosome 2H.**

**A)** SSCP segregation pattern of *BGRF1* 3'UTR region in Nudinka x *Vulgare hybernum* istmmos Balkan F2 population. G392: number in the stock collection at Max Planck Institute, Cologne. **B)** Nucleotide sequence comparison between *BGRF1* 3'UTR amplified with primer pair *BGRF1* lu6/lu7 from Nudinka (top row) and *Vulgare hybernum* istmmos Balkan (bottom row). Red circles indicate SNPs. **C)** Schematic representation of map position of *BGRF1* on chromosome 2H (Castiglioni et al., 1998). **D)** Region of chromosome 2H, sub linkage groups 19-20, where *BGRF1* locus was mapped. Linkage analysis was carried out on 45 and 33 plant DNAs, homozygous for the Nudinka and G392 alleles respectively. The two AFLP loci common to Castiglioni et al. (1998) map and the Nudinka x G392 map were E3540-5 and E4238-7 that mapped 26 and 9.6 cM from *BGRF1*, respectively.
