# Supplementary material
Source: PubMed Central journal article supplement (PMC2996029)
Supplement: pp.110.161984_2.pdf [file pp.110.161984_2.pdf]

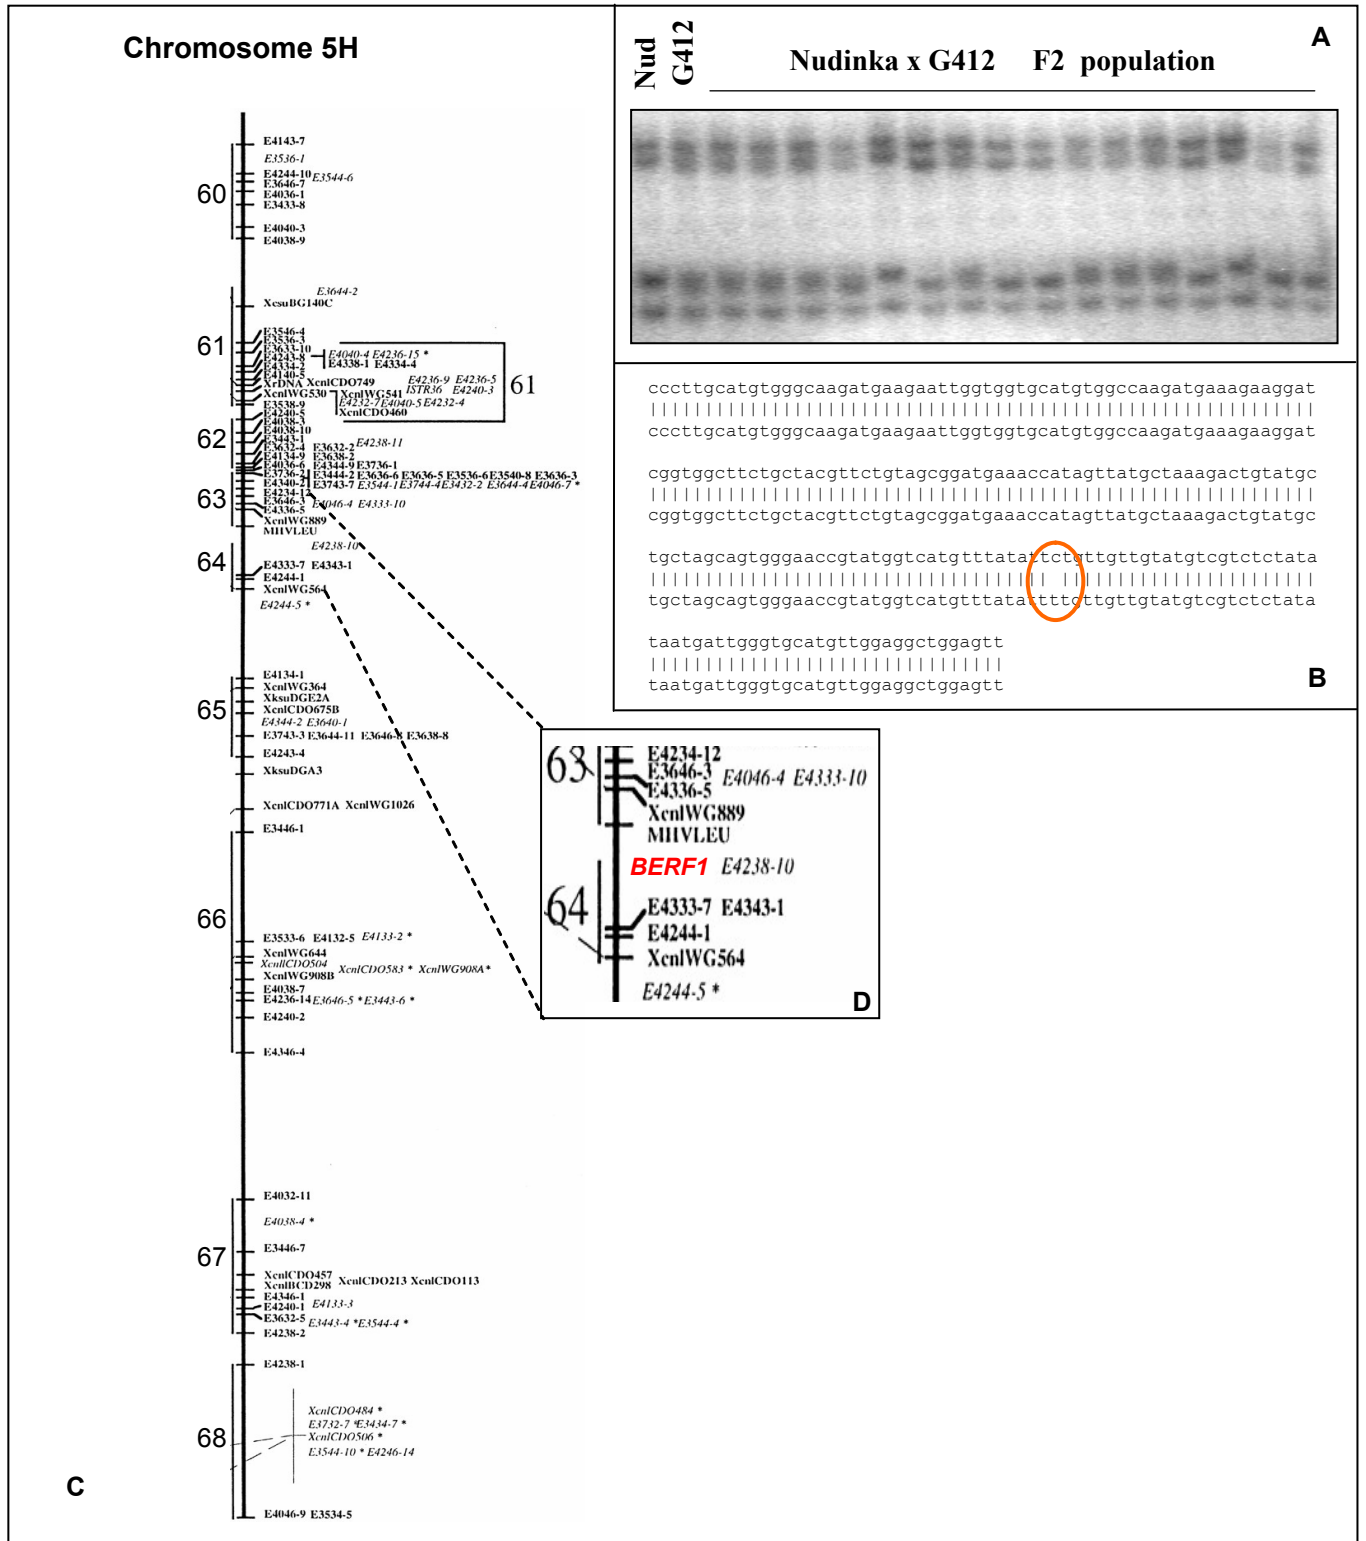

**Supplemental Figure 1B. Assignment of the *BERF1* locus to barley chromosome 5H.**

**A)** SSCP segregation pattern of *BERF1* 3'UTR region amplified with primer pair HvERF1 lu6/lu7 in Nudinka x *Disticho nutans* Proskowertz CS F2 population. G412: number in the stock collection at Max Planck Institute, Cologne. **B)** Nucleotide sequence comparison between *BERF1* 3'UTR from Nudinka (top row) and *Disticho nutans* Proskowertz CS (bottom row). Red circle indicates the SNP. **C)** Schematic representation of map position of *BERF1* on chromosome 7. **D)** Region of chromosome 5H, sub linkage groups 63-24, where *BERF1* locus was mapped. Linkage analysis was carried out on 33 and 38 plant DNAs, homozygous for the Nudinka and G412 alleles respectively. Based on segregation of six AFLP loci (E3546-4, E4334-2, E4240-5, E3632-4, E4333-10, E4336-5) common between Castiglioni et al. (1998) map and the Nudinka x G392 map, *BERF1* was mapped in the indicated region, 6.2 cM from E4336-5.
