# Supplementary material
Source: PubMed Central journal article supplement (PMC2996029)
Supplement: pp.110.161984_3.pdf [file pp.110.161984_3.pdf]

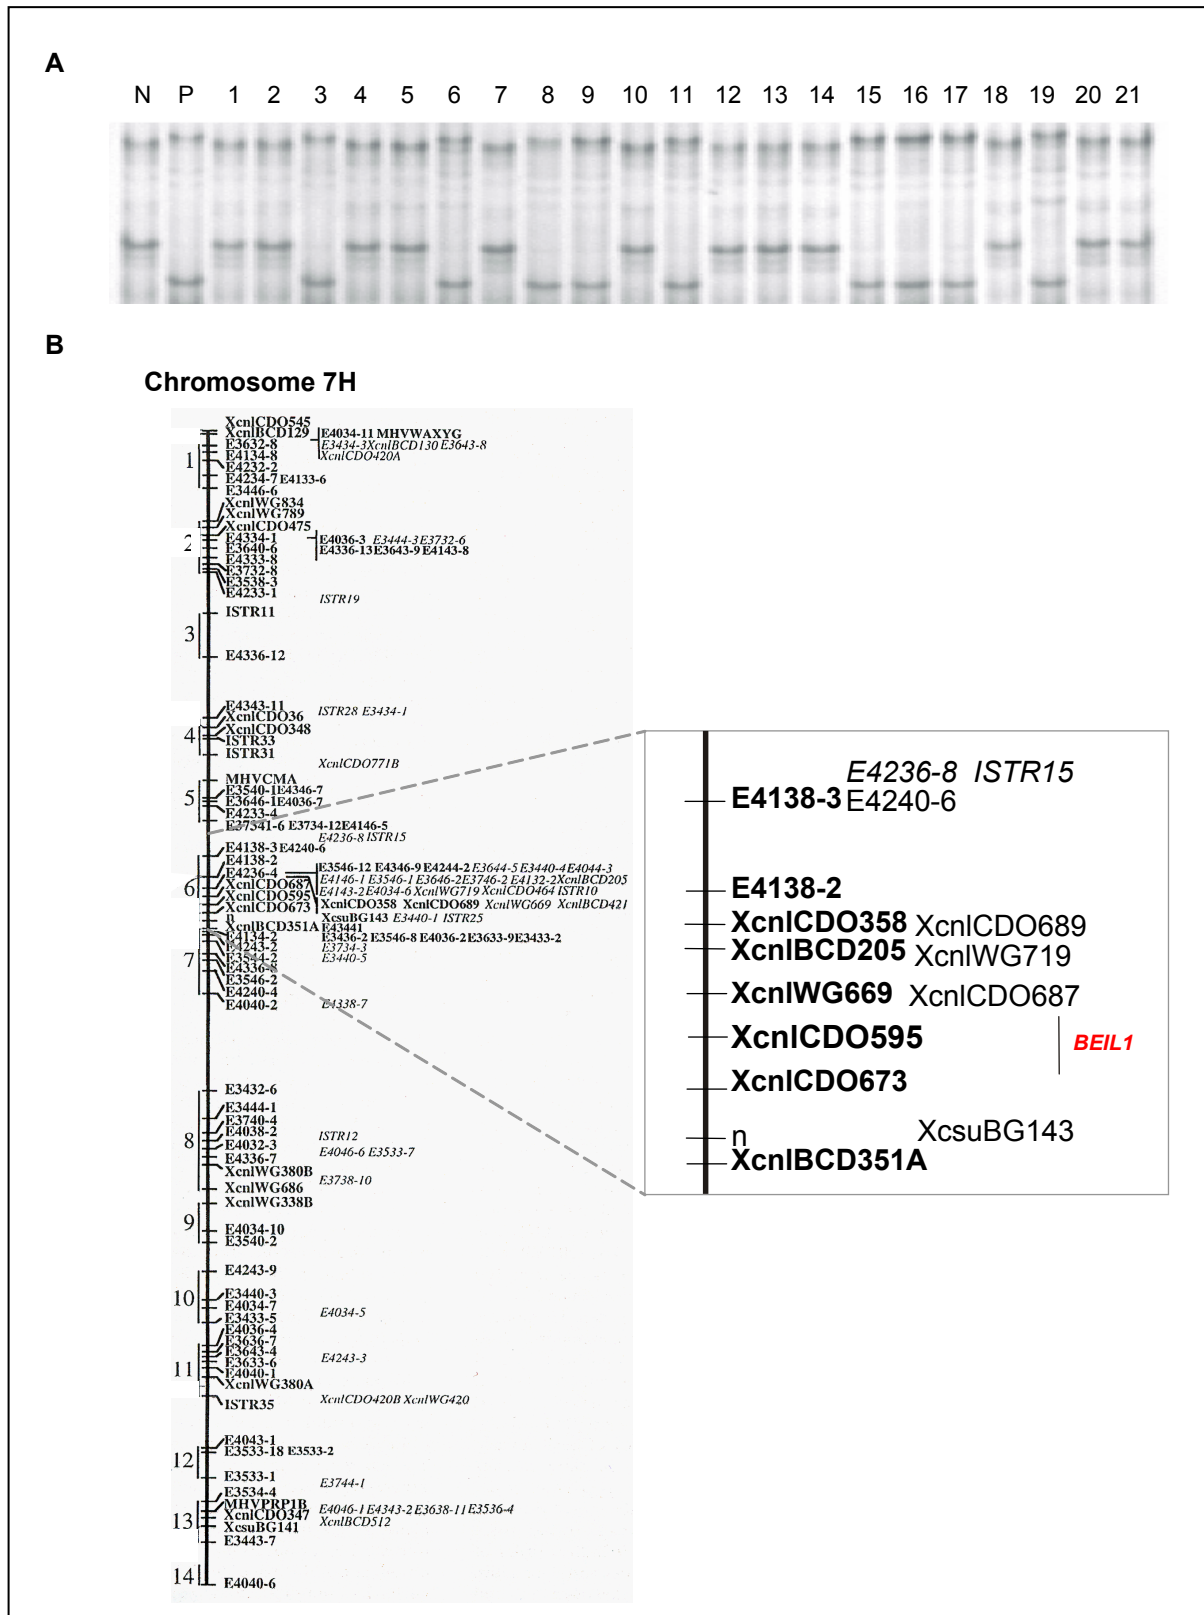

**Supplemental Figure 1C. Assignment of the *BEIL1* locus to barley chromosome 7H.**

**A)** SSCP segregation pattern of a 420 bp intron fragment from *BEIL1* amplified by PCR with gene-specific primers *BEIL1* 27/28. 1-21: 21 out of 100 DH lines of the Nudinka (N) X Proctor (P) mapping population, the segregation pattern of the remaining 79 individuals is not shown. **B)** Schematic presentation of the map position for *BEIL1* on chromosome 7H. The linkage map of barley chromosome 7H is shown at the left hand side of the figure (Castiglioni et al. 1998).
