# Supplementary material
Source: PubMed Central journal article supplement (PMC2996029)
Supplement: pp.110.161984_4.pdf [file pp.110.161984_4.pdf]

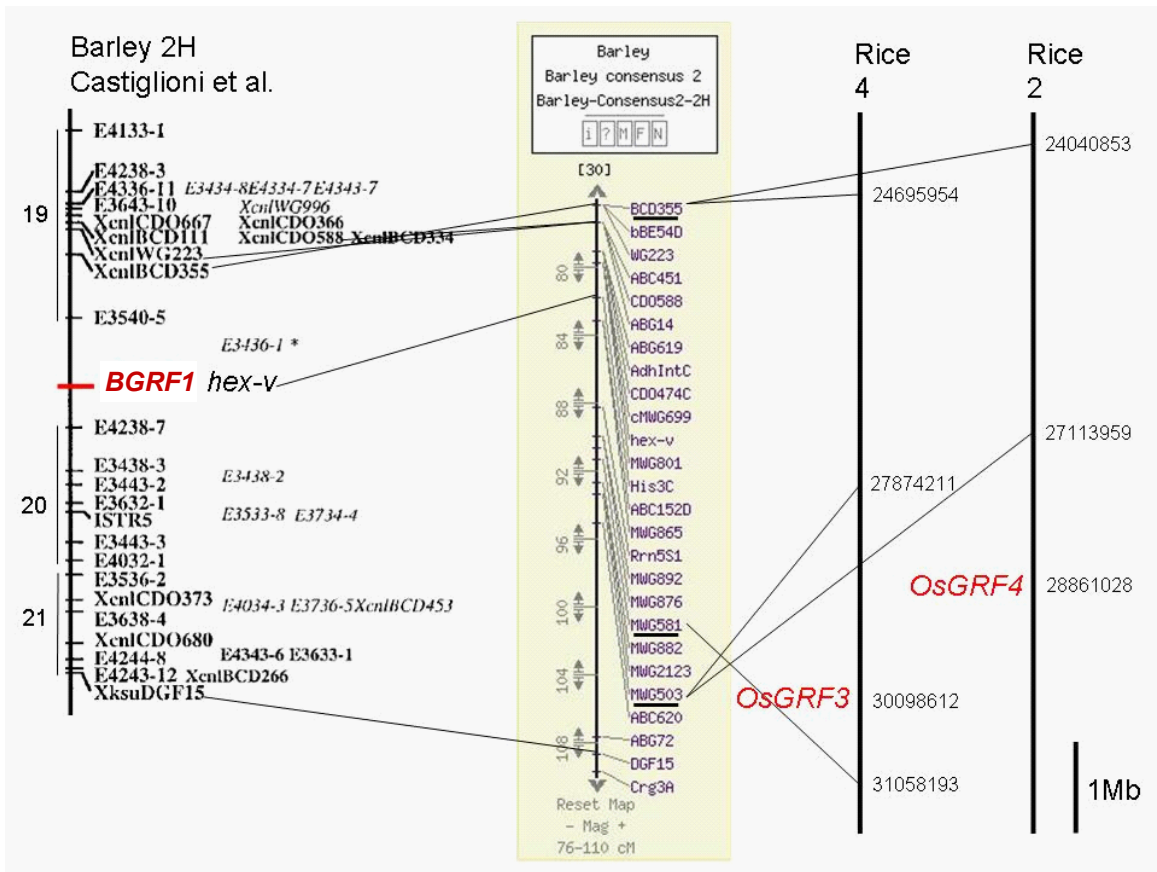

**Supplemental Figure 2A. Colinearity between barley chromosome 2H and rice chromosomes 2 and 4.**

Alignment of barley map from Castiglioni et al. (1998, left), barley consensus 2 map (centre, <http://wheat.pw.usda.gov/GG2/index.shtml>) and rice chromosomal regions (right): based on previous synteny results (Rossini et al., 2006, Pourkheirandish et al., 2007), selected barley marker sequences (underlined) were mapped by similarity searches on the current assembly of the rice genome sequence (<http://www.gramene.org/> July 2008) defining two syntenous intervals. The position of *BGRF1*, along with coordinates of *OsGRF3* and *OsGRF4* genes are indicated.
