# Supplementary material
Source: PubMed Central journal article supplement (PMC2996029)
Supplement: pp.110.161984_5.pdf [file pp.110.161984_5.pdf]

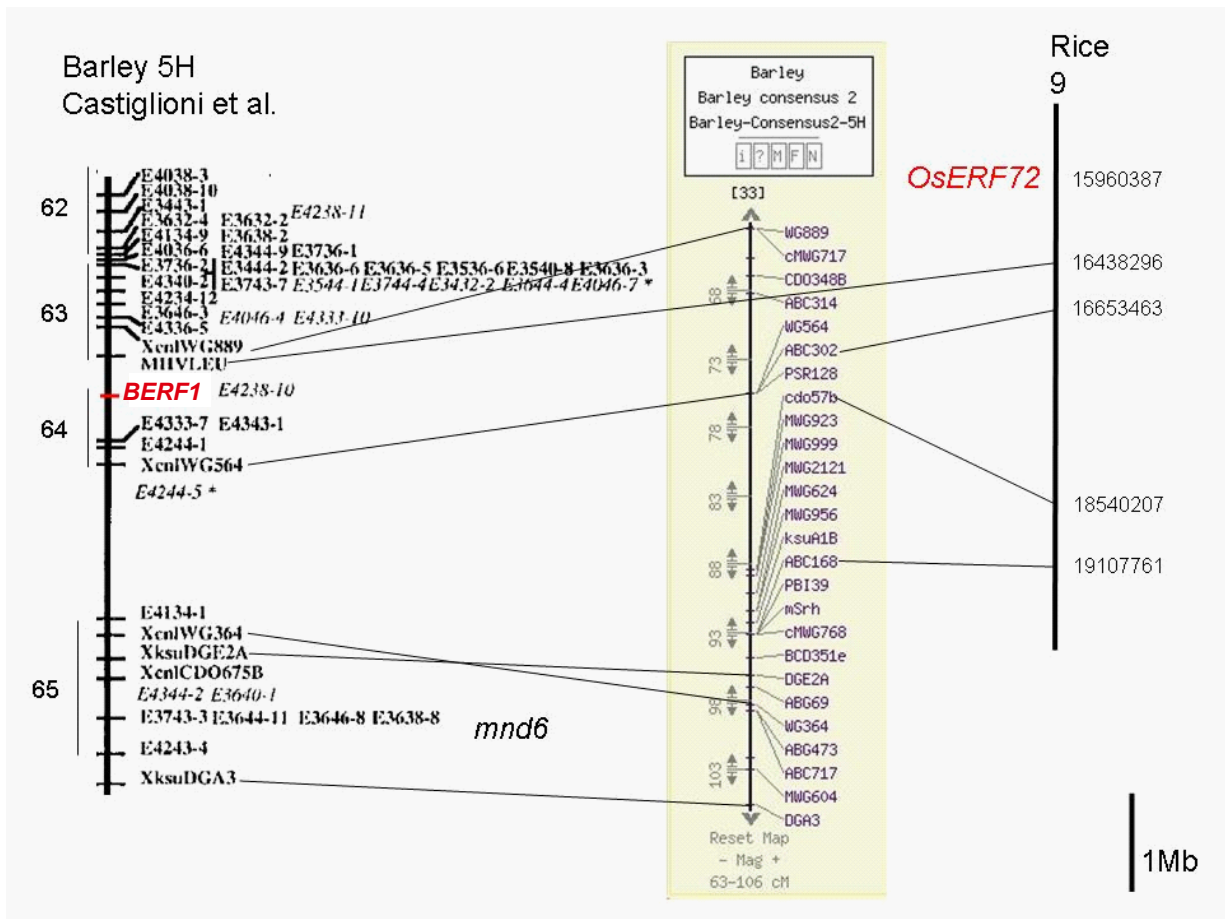

**Supplemental Figure 2B. Colinearity between barley chromosome 5H and rice chromosome 9.** Alignment of barley map from Castiglioni et al. (1998, left), barley consensus 2 map (centre, <http://wheat.pw.usda.gov/GG2/index.shtml>) and rice chromosomal region (right): based on previous synteny results (Rossini et al., 2006), selected barley marker sequences were mapped by similarity searches on the current assembly of the rice genome sequence (<http://www.gramene.org/> July 2008) defining a syntenous interval. The position of *BERF1*, along with coordinates of the *OsERF72* gene, are indicated.
