# Supplementary material
Source: PubMed Central journal article supplement (PMC2996029)
Supplement: pp.110.161984_6.pdf [file pp.110.161984_6.pdf]

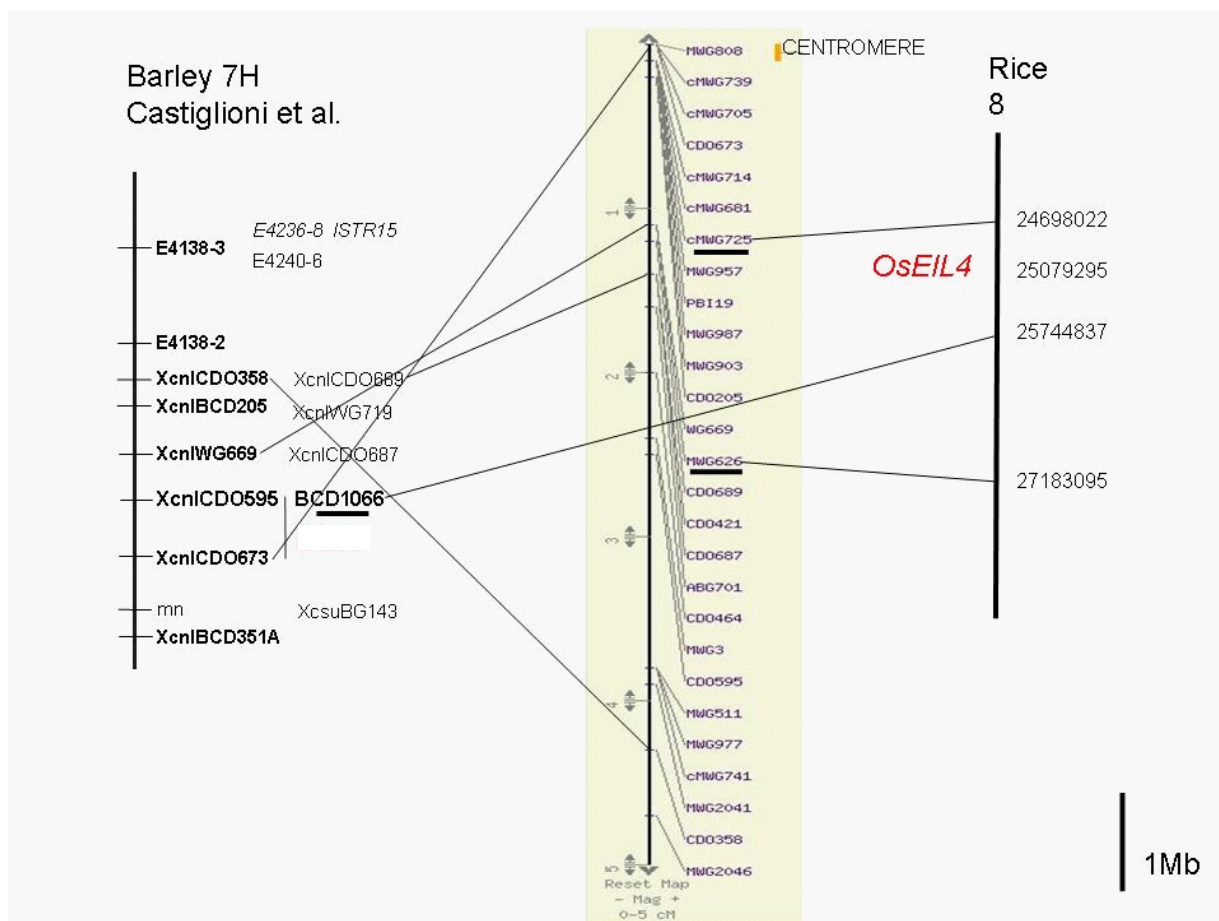

**Supplemental Figure 2C. Colinearity between barley chromosome 7H and rice chromosome 8.**

Alignment of barley map from Castiglioni et al. (1998, left), barley consensus map (centre, <http://wheat.pw.usda.gov/GG2/index.shtml>) and rice chromosomal region (right): based on previous synteny results (Rossini et al., 2006), selected barley marker sequences (underlined) were mapped by similarity searches on the current assembly of the rice genome sequence (<http://www.gramene.org/> July 2008) defining a syntenous interval. The position of *BEIL1*, along with coordinates of the *OsEIL4*, gene are indicated.
