# Supplementary material
Source: PubMed Central journal article supplement (PMC2996029)
Supplement: pp.110.161984_7.pdf [file pp.110.161984_7.pdf]

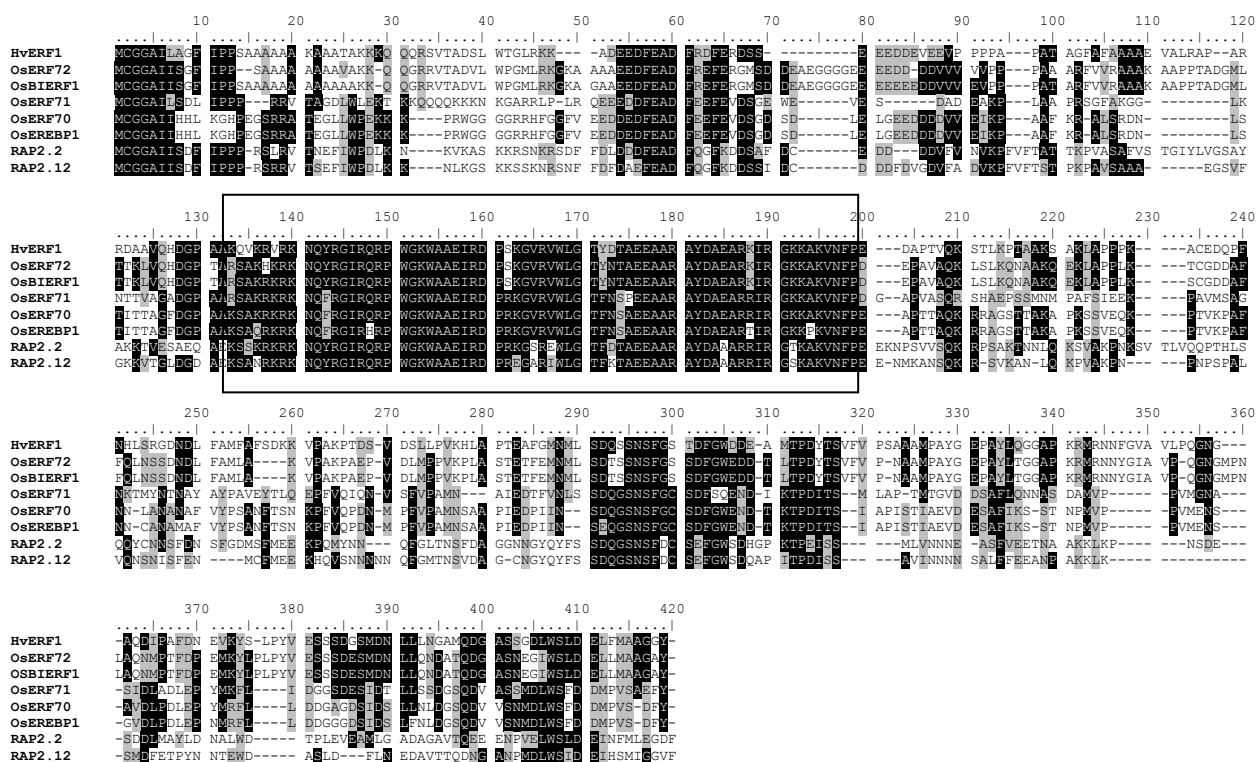

### Supplemental Figure 3A. Sequence alignment of class VII Ethylene Responsive Factors.

The sequences reported are, beside BERF1, from *Oryza sativa* and *Arabidopsis thaliana*. The box includes the APETALA2 DNA binding domain as defined by Nakano et al (2006).
