# Supplementary material
Source: PubMed Central journal article supplement (PMC2996029)
Supplement: pp.110.161984_8.pdf [file pp.110.161984_8.pdf]

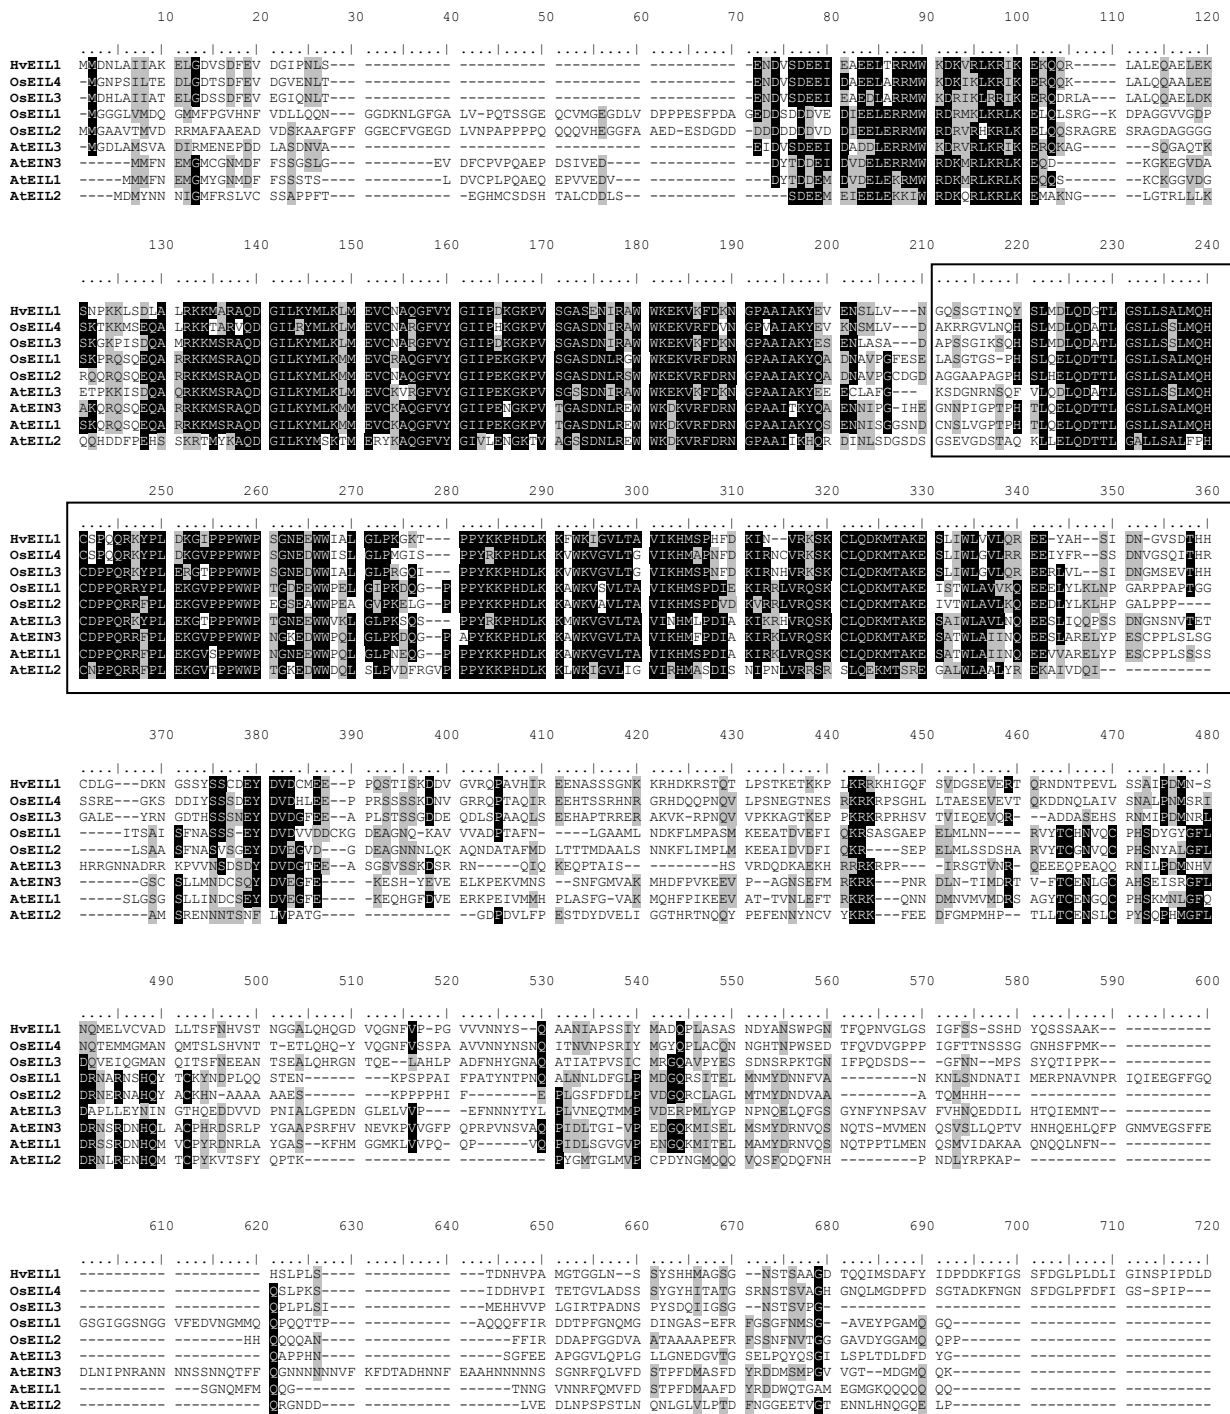

730

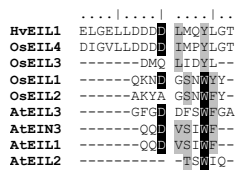

**Supplemental Figure 3B. Sequence alignment of Ethylene Insensitive Like proteins.**  
The sequences reported are, besides BEI1, from *Oryza sativa* and *Arabidopsis thaliana*. The box includes the  $\alpha$ -helical structures that constitute the DNA binding domain (Yamasaki et al.,2005).
