# Supplementary material
Source: PubMed Central journal article supplement (PMC2996029)
Supplement: pp.110.161984_10.pdf [file pp.110.161984_10.pdf]

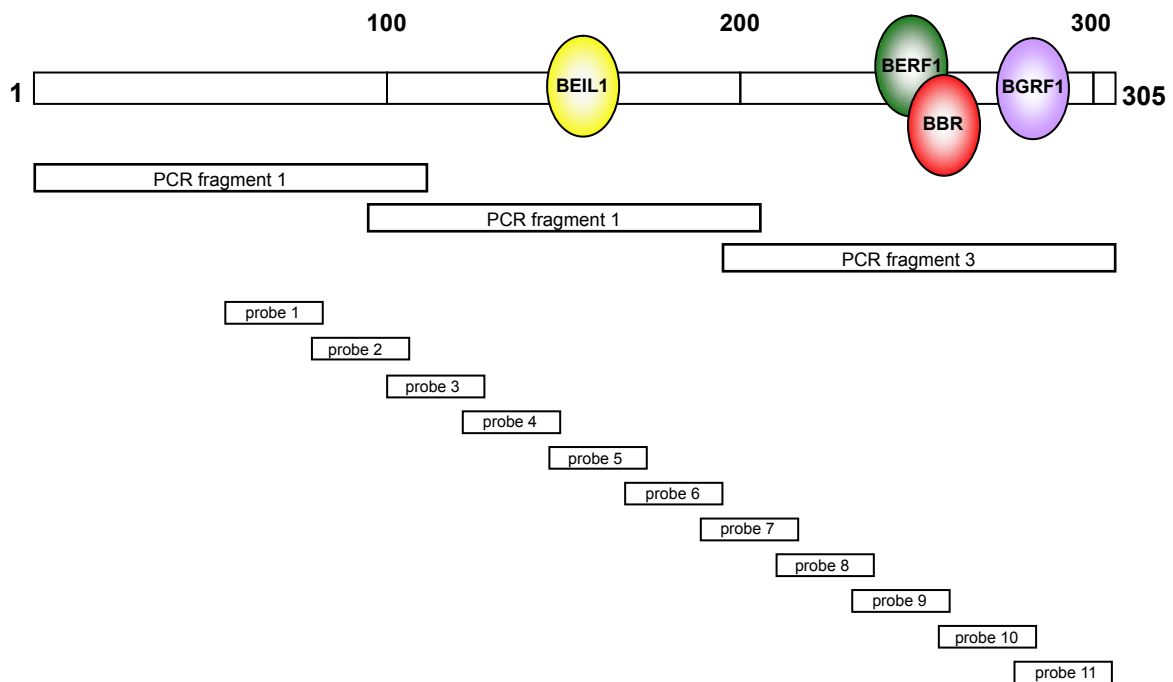

**Supplemental Figure 5. KIBPs specific binding to the 305 bp element.**

Schematic representation of KIBPs binding sites within the 305 bp element. In red, BBR; in violet, BGRF1; in green, BERF1; in yellow, BEIL1.

Three overlapping fragments spanning the 305 bp enhancer were produced by PCR and tested in gel retardation assays. Subsequently, the region from 80 to 305 bp of the element was divided into 34bp overlapping fragments which were used in EMSA. The binding site of the BBR protein is also reported.
