# Supplementary material
Source: PubMed Central journal article supplement (PMC2996029)
Supplement: pp.110.161984_11.pdf [file pp.110.161984_11.pdf]

**A**

TCGAGCTGGCCGCAATTCCGGAGCATCGACGACAAATCCGGCATATG**GGCGGC**TTCTTCCGACATGCGGGCAGCGGATCCGGTGAAGTTTCAAGTAGATTCCGACCAGTTC  
CGTGACGATGCGTTTGTACGTGAGGTTTACTAGTTTACTGATTAACCTGTATACTGTCTCCAAAATAACATATAAGTTTTTGGCGATGAATTTACAGTCCCTCCGG  
TTGCATCAGGAGCGAGAGCGGTGCGTGTGTGCATGCCACTACTCTGTTTCTCGTGTGGTACATTTGTGTGTTACTAGCATGCGCACGTATGCATGATTAATTTCTTTCG  
TGATTACCTTAGGTACGTTGTCAATGGACACTACCTAAGAGATGCATGCATATCATACCACAATAGCTACAAAACCTAATCACTATACATAAGAATAAATCTGTGAATTTCC  
GGCTCCTCTGACCGAGATTACATGGTCAAGATTCTCTCGGTTGTTCTTTTCTTATACCGACTATGTTTCTTCTCGTAAAAATATACTTCTTCTCGTGTAT  
TTATTTTGGGCTATTACAAGTATTGAATATTTAAACCCCTATAATTTTGTGATTTAACTTTACCTTTGCAAGCTAAGATGTTTCCGAGCAACGCACATGGTATATCT  
AGTACCAATAGAAAAACAATCTCTCACACGCAGGACGTATACGTATCACACATAATTGCATGTAATTGCATGTTGTGTGCATTCGTAGGGATGAATGTACACATCATGA  
TATAATTGCATGTTGTGTTAAATAACAGAATAGTGTACAACAAAACAAAACACACCGTGCCTACTTATTACGTTTACGGCTTGGTTGTACAGTAGTGCACAATAC  
ATACTCCAGTTGTGTACAGGTAAGAGAGAGAAAAAAGAGAAAAACCTGGGCCACACGTATAGTACAACATAGCCGACATGTCCACAGTCCGGACACACACACGC  
GCAG**GGCGGC**CGGAGCGCCGGTTAAATGCGTCAAGACGGCCGGGACAGCCGGAGCAAAGCGTAGCGCAGCGGCACTGTGTGCTTACCGCAAAACAGCCTCCAGCCCA  
CCACCCTGTCAGCGCTAGGCAGGCTACAGACAGCCGTTCTCTGTTGTGACGCTCCCGCGGTTTCTCATCGCGCCAAAATAAACTCGTAAGCTAAGCGGCTTTCCGG  
CTCATCTCCTCGACACAGTTGACAGGTAATAAAAAAACCACGAAACATGGCGTGACGCCATCGACGCGCGCGCCACGGGACGGACGAAACGGACGGACGCGCCACCGGAGGC  
GCAA**GGCGGC**GCATCGCGTCCGGCACACGCACGCACGCACGCCAACCACCCAAAGCCTGCTCGCGTCCGCTCGACCGGACCGGTAGATGGATGGACGGATCAC  
ATGGTCCGTTGGCTCCAAAAGCAGCTTTGGCCAGCCCTACTTCCATCCAGCCACATCTTCTGATCGCATTTACGTACGACTTTACACACATCACAGCCAAACTTCCAC  
GTAGTAGTACACAGGCTCTACAAGATACGCACGCTTGGTGCCCGGAACCTACGAGGTTCT**GGCGGC**GTCAGGTATACATACAGCCATCTACAGCATCCATCCATC  
GTTGGGGCATACTTCCGCTGTACCACAGCACCCACCCGCGTGAGCCATGCGGTACTAGCAGTAGCAGTGTAGTGGTAGTACTACTACTGCAAGAATACTGATACC  
CGCAACGAACTCCCTCACGCTCTGGCAGCAGCAGTAGCAGTACTAGTGCACACGGCTCACTTTGCTCTACTTTAGCGCGAAAGAGACCGGTAATAACAAAATTAACC  
CGGGGTGAAAAGGTGTAGGAGCGCCAGGCGCTTCGATTGTGCGCGTCCGGTAGCGGTGACGGACACCGCTATTATAAGTAGGGAGACCGCCCGCCAGCTAGTAGC  
ATCGCCACCACCTCCATCCCCACTCCGCCGCAAAGCTCGCTCCTCCATCACTGT**GGCGGC**CGTGCTCGCTCTCCCGGACGGCACCGATCTAGCCCTCCCTCCCTT  
ATCCACAGCTCG

**B**

CTCCACC CGCGCTTTAGCCCTCTCCGCCGTTGTGCGATGAGGGT**GGCGGC**CCTCATCTTCTCGTCTCGCTGCGGCTGGATAGAGGATTGCGGGTTGAATAGTGTGAAACGA  
AGGATTTTTTTTTGTAAAACCGAAACGGTACCACAGACAGGGGTGGAGACAGGCCCCACGCCCCAGGGCTGGGCCCGGGTCTGAGGCCCACTTACTTGTGATTATA  
GCAATTTAAGGATATGAGTCCAAATCCAGACAACCTTTGAA**GGCGGC**CTGGGGCTT**GGCGGC**GGCCTGGCTCCGCCCATCCATTTTCAGAAGGACTGCGAGTTGAA  
ACCTAAAATCTCAGGGGCTTTGTGCAAAAACGGTCTGCAAAAATGAACATGAGCACAAAATGAACAGATTGAAAAGATTTACAAATGTGACCCCTTTAGAAAACACCACAA  
GCAGTGACGTTGCTGCCCACTATGTAACGCGAGTCTACCATGGCGTTGCTGCCCTACTGTGAAACGCCTGTCTACCGTGGCGTTTTTCTTTCTTGCAACGCCAGTCTAT  
TTGTGGCGTTGGCGACCCACTGTGAAACCAAAAACCTTTGGCGTTGACAGACTCACTGTGGAACGTCAATAGCACGACATTTCAACCAGCCCATGGCATGCTGCATTCTAGT  
AAGTGTGAAACGCCATGAACCATGACGTTTCCGCGCTGGCCAGCAACGCTAGCTACGTAAGGTAGACTGGCGTTTGAATGTGGGTCTACAACGCCACGGTAGACTGGCGT  
TTCTAAGTGACGCGGCAACGCCACAGTCTGTGGCGTTTTAAAAAAGTCAGATCATAAAATGTTTTTAATCAAAGTTTCATTCGGTGCAATATTTTTTATCCAGAGTCAA  
AATAGTAAAAAATCCGACGGACAAAAGCACTTTTTATTTAAGAACAGACTAACACAAATGCCCTTGGCTTGAACGGGAAATAAGTATGATGATCATGTTTTGGAAT  
AAACAATGTAATGATCCTTCCCTGAAATTTAAGGCGTATGTTAAAAATATATAGAGTACAAAATAAACTCAAAGTTTGGATTTTGTATGATATGAATGAAGGC  
ATGATAATCCATGTGCGTTGATAAAAAGATAAATTTCAAATTTGCATTTACTACATGTTTTTGAAGAATTCCTACTCCCTCTTGAATAATAACCATGCTAGAACTCC  
AATTTGTATGTACAAAATCAATCTCTCTTGAACATATTTAAAGCTTAGAAAAGTAAAAAGAAAAGAAAAGGAGCCGATGGGATCAAACCTGGGTCTTCAGGTTAGAAGA  
CCAAGGAACTCTCCATCCCGCTAGAGCTTCAAGTGTGACATATTATGCCATAGCCGGGTATAACCATTACGTGTGCGGGCGGTTACTTAAAAAAAACCGAATCGTTTTTTG  
CTCAGGGTGGCATGGTGGGTAATTTTATGAAAACCTTTAGGACATTTTTTATGACGTACTACAGAAGCAATAGGTGCTTTTATTAGCGAGTATAGATATAGATAAAGACGTG  
CGTTGTACGTTTACTGGTACAGGAAAAAGGTAAAGCGCACGAGGCGCATCGTGCCTGCGCGCTCGGGATCTTCCGTGGAGAGCGCGGCCACAACAGTCTCACTCGTTCTC  
TCTCAAAAAGAAAACAAGTACACTCGCGCACGCCACATCCAGCCAGCATCACAGGGTCACTCACAGACACACACAGCATCCCGAAAATGAGAGCGACCAATTTTTTC  
GGCAACATAAAAAAACAGCACCATTAATCTCCCGTGACGCCACGCCCTGCGTACGCTTCCCTAGCTGTGTCACCGCGCCGCTTTCTCTGCCCCGTTCTGT  
CTCTTACCCCGTCTCCCGAATAAAAAACGAAAATAACTG**GGCGGC**GACAGCAGCAATCCGAGACCCCTCCACCCCAAACTTCCCCCGCCGATCCCGCGGCGA  
CCATTCGTCGACGAGGTACGGATAAGCGCCGCGCTTGTCTTTTTTTCTTTCTTTCCGGATGGATTTTTTTGTGGGATGATCCTTCCGTTCCATCCGTCCGGCAGAG  
ATTGGTTGTTGGCATGATGATTTCCATTCGTTGCGCCCGGTTTTCTAGGGTTTGCCTGGGATTCAGATTGCCCGCCCTTCCGACCCACAGTCTCGGATCATCGCGTCT  
CTGATTTGATTTGGTGGGTTGGAAGTTCCGAACGAATGCCCTCACATAGATTGATCTTGTGTGCTCATGTTTTTTTTTAAATCGTAGTATTGCTCGGTTGGCTTTGT  
AATGTACTCCCACTGATGGCTTGCACACCGAGAAAATGATGGCGTTGGCTCCGTACAAATTTGCTTCAATAATTGCTGAAATCTTGTAGCAGTAACATGCTAGGATGTTCTC  
GTCACAGTGCACATTTTGTATGATCAGGTGAGAAGAAAAGCGCGTTTTATAAAAACATAGAGTTGGGATAAGTGCCTTTGACAGTTCTGTGATGCATGCTATGGTC  
ATAATTCATGGTTGTTCTTTTTTTCAGCTGACTAGCATTTGCATTTCTCAGATATTGACCGCATCAGAAAATTTGACAGTTGACAGATATTTCTTCTCGATTGATGGTCAAA  
AAAAAAGTGGCGCAAGTTGACTAGGGTGATGTTATTGAGTTTGTAGTAAACACTAGAGATGATG

### Supplemental Figure 6. Nucleotide sequences and analysis of *BERF1* and *BEIL1* upstream genomic sequences

The presence of GCC-box, predicted to be a motif involved in the response to ethylene, was investigated with the Signal Scan tool of the PLACE website.

A) Sequence of the *BERF1* promoter (2.1 Kb) containing the GCC-box in both forward and reverse orientations. B) Sequence of the *BEIL1* promoter (2.7 Kb) containing the GCC-box in both forward and reverse orientations. GCC-boxes are high-lighted and represented in bold.
